# Supplementary material for: Influence from defects of three-dimensional graphene networks on the interface condition between the graphene basal plane and various resins
Source: Royal Society of Chemistry journal article supplement (doi:10.1039/c8ra04932g), 2018-01-01
Supplement: c8ra04932g1.pdf [file c8ra04932g1.pdf]

## **Influence from defects of three-dimensional graphene networks on the interface condition between graphene basal plane and various resins**

**Table S1** The thermal conductivities of various TIMs by using the monolayer and three-layer 3DGNs as the filler (the defect density of the 3DGNs is  $2.52 \times 10^8 \text{ cm}^{-2}$ ).

| Samples  | Thermal conductivity ( $\text{Wm}^{-1}\text{K}^{-1}$ ) |          |          |          |                         |          |          |          |
|----------|--------------------------------------------------------|----------|----------|----------|-------------------------|----------|----------|----------|
|          | Monolayer 3DGNs (wt%)                                  |          |          |          | Three-layer 3DGNs (wt%) |          |          |          |
|          | 5                                                      | 10       | 15       | 20       | 5                       | 10       | 15       | 20       |
| 3DGNs-ER | 2.6±0.14                                               | 3.7±0.16 | 4.1±0.12 | 4.6±0.12 | 2.5±0.11                | 3.7±0.12 | 4.2±0.10 | 4.6±0.13 |
| 3DGNs-AR | 2.0±0.11                                               | 2.8±0.14 | 3.6±0.14 | 4.2±0.12 | 2.1±0.12                | 2.7±0.16 | 3.6±0.12 | 4.2±0.15 |
| 3DGNs-PR | 1.6±0.12                                               | 2.5±0.12 | 3.2±0.12 | 3.8±0.14 | 1.6±0.10                | 2.4±0.18 | 3.3±0.09 | 3.8±0.11 |
